# Supplementary material
Source: PubMed Central journal article supplement (PMC4834225)
Supplement: NIHMS762648-supplement-1.pdf [file NIHMS762648-supplement-1.pdf]

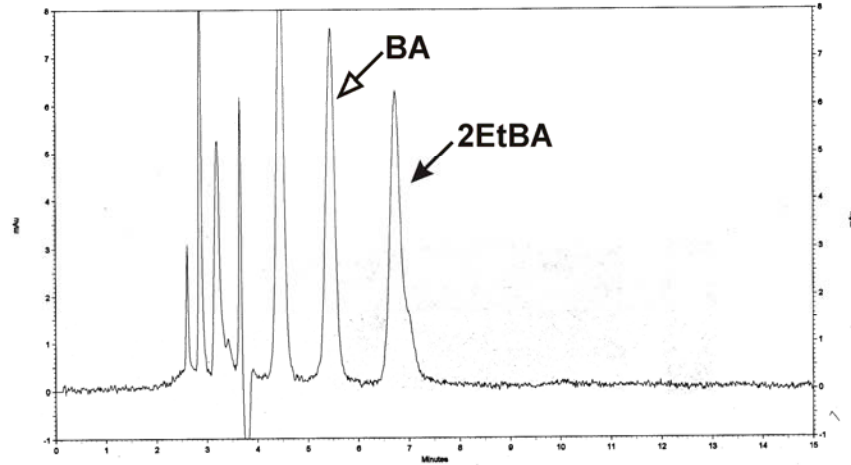

**Supplementary Figure.** Representative chromatograph for monitoring butyric acid (BA) levels. The elution profile for 2-nitrophenylhydrazine derivatives of BA and 2-ethylbutyric acid (2EtBA), the internal standardization control, is shown. The retention time for BA is 5.5 min and for 2EtBA is 6.7 min.
